# Supplementary material for: Facile and green synthesis of graphene oxide by electrical exfoliation of pencil graphite and gold nanoparticle for non-enzymatic simultaneous sensing of ascorbic acid, dopamine and uric acid
Source: Royal Society of Chemistry journal article supplement (doi:10.1039/c5ra11723b), 2015-01-01
Supplement: c5ra11723b1.pdf [file c5ra11723b1.pdf]

**Facile and green synthesis of graphene oxide by electrical exfoliation of pencil graphite and gold nanoparticle for non-enzymatic simultaneous sensing of ascorbic acid, dopamine and uric acid**

*Habibulla Imran, Palinci Nagarajan Mainkandan, Venkataraman Dharuman\**

Department of Bioelectronics and Biosensors

Science Campus

Alagappa University

Karaikudi – 630 003

*Tel.: +91 4565 223361 ; Fax: +91 4565 225525*

*E-mail : dharumanudhay@yahoo.com*

Fig. S1. UV behaviors of the electrically exfoliated GO in PBS (PGO, curve a), HCl (HGO, curve b) and NaOH (NGO, curve c)

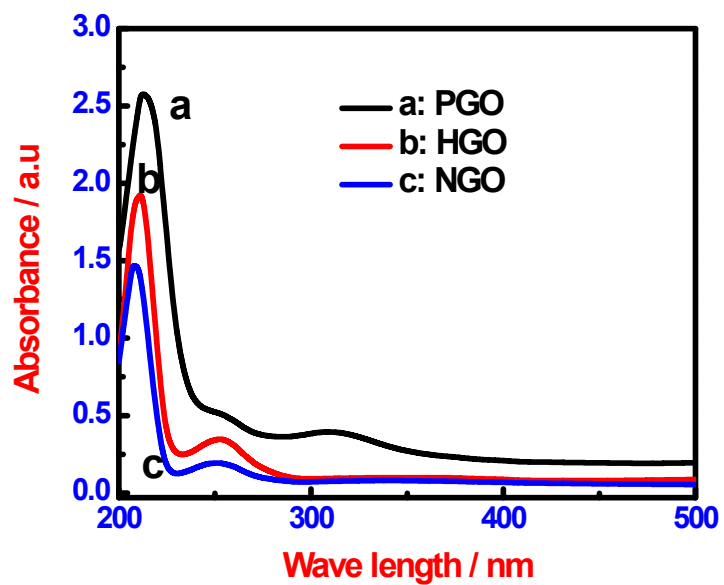

Fig. S2. Photo chemi luminescence behaviors of the electrically exfoliated GO in PBS (PGO, curve a), HCl (HGO, curve b) and NaOH (NGO, curve c)

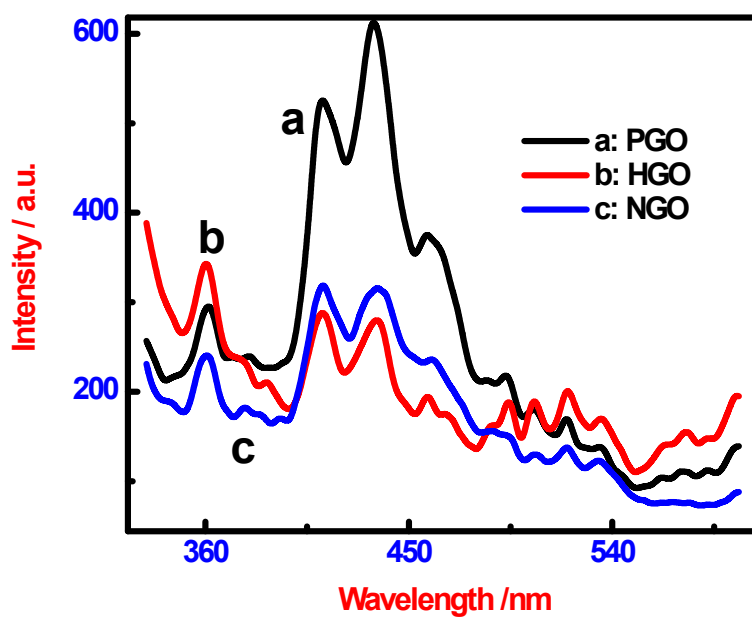

Fig. S3. Contact angles measured using contact angle goniometer for the electrically exfoliated GO. (a) PGO, (b) HGO and (c) NGO.

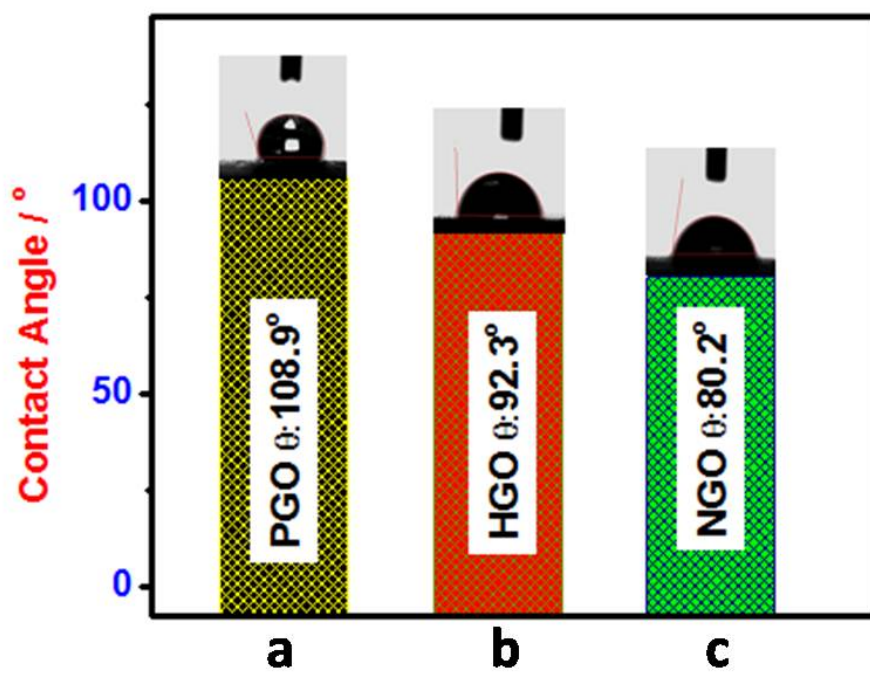

Fig. S4. Selective detection of AA (A), UA (B) and DA (C) using PGO-AuNP composite measured by DPV. Inset: Current *versus* concentration plots of the respective analytes. Error bars are included.

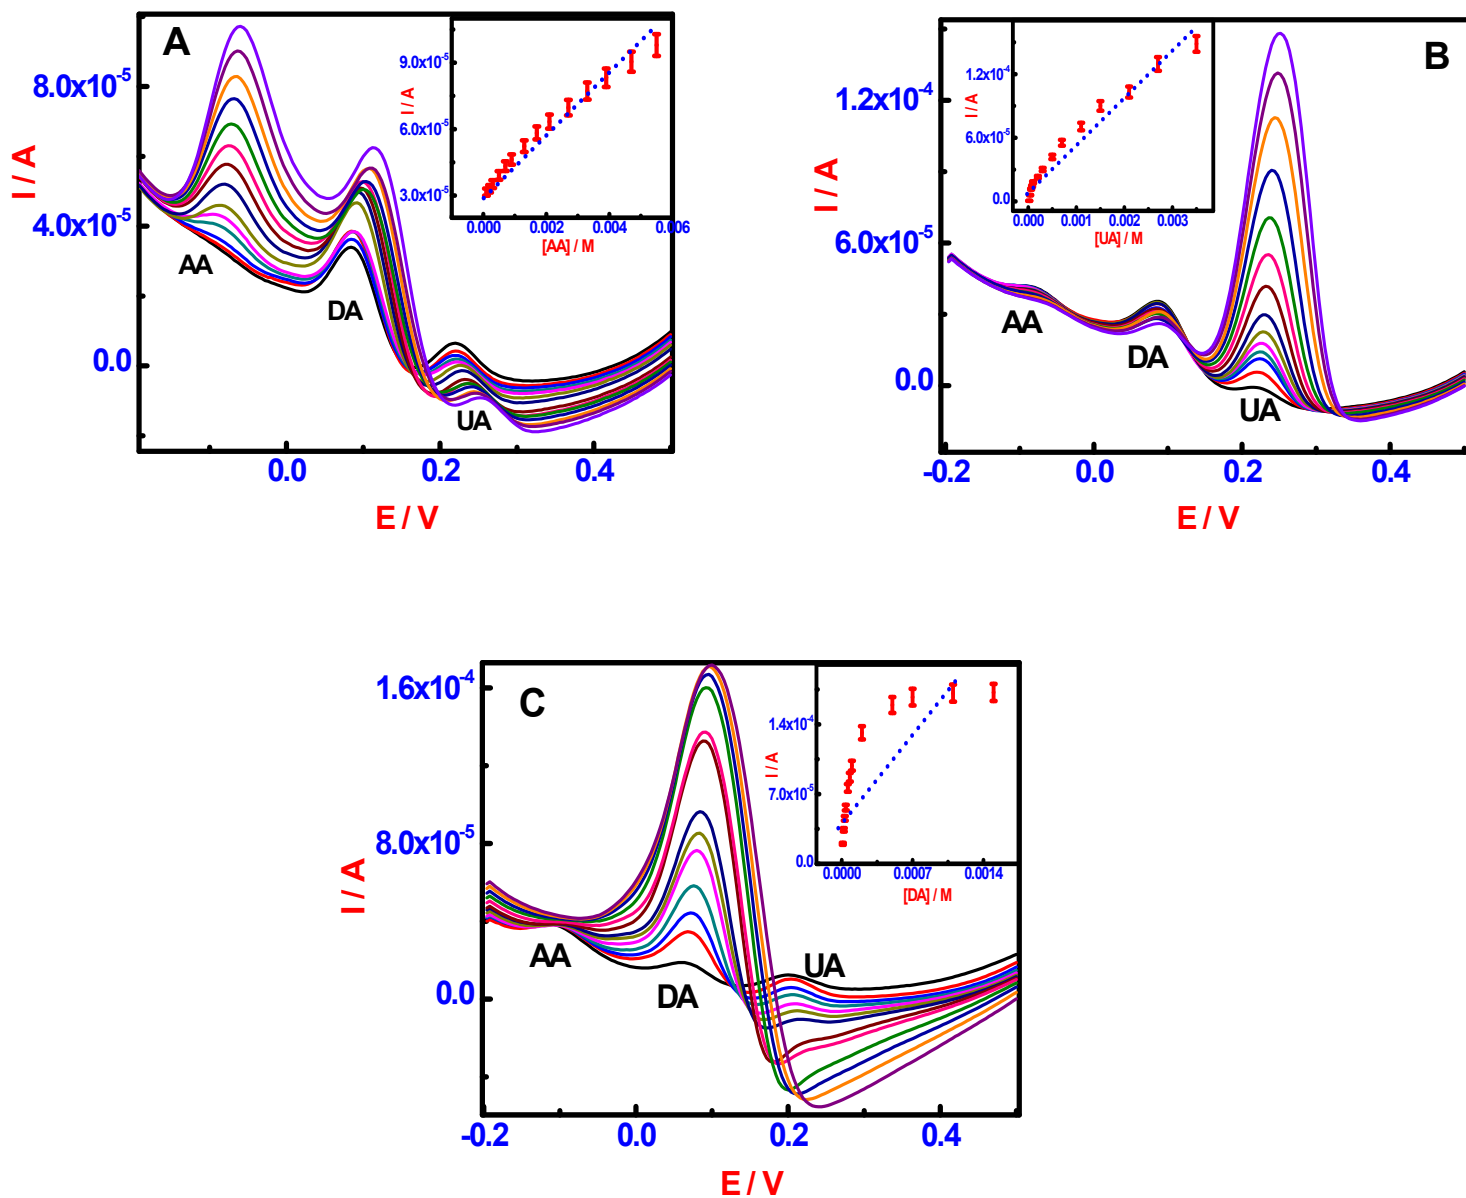

Fig. S5. Lineweaver-Burk plots for calculating the Michaelis-Menten kinetic parameter  $k_M$  for the GCE-PGO-AUNP (A-C) and GCE-PerGO-AuNP (D-F) for the analyte AA, UA and DA in phosphate buffer.

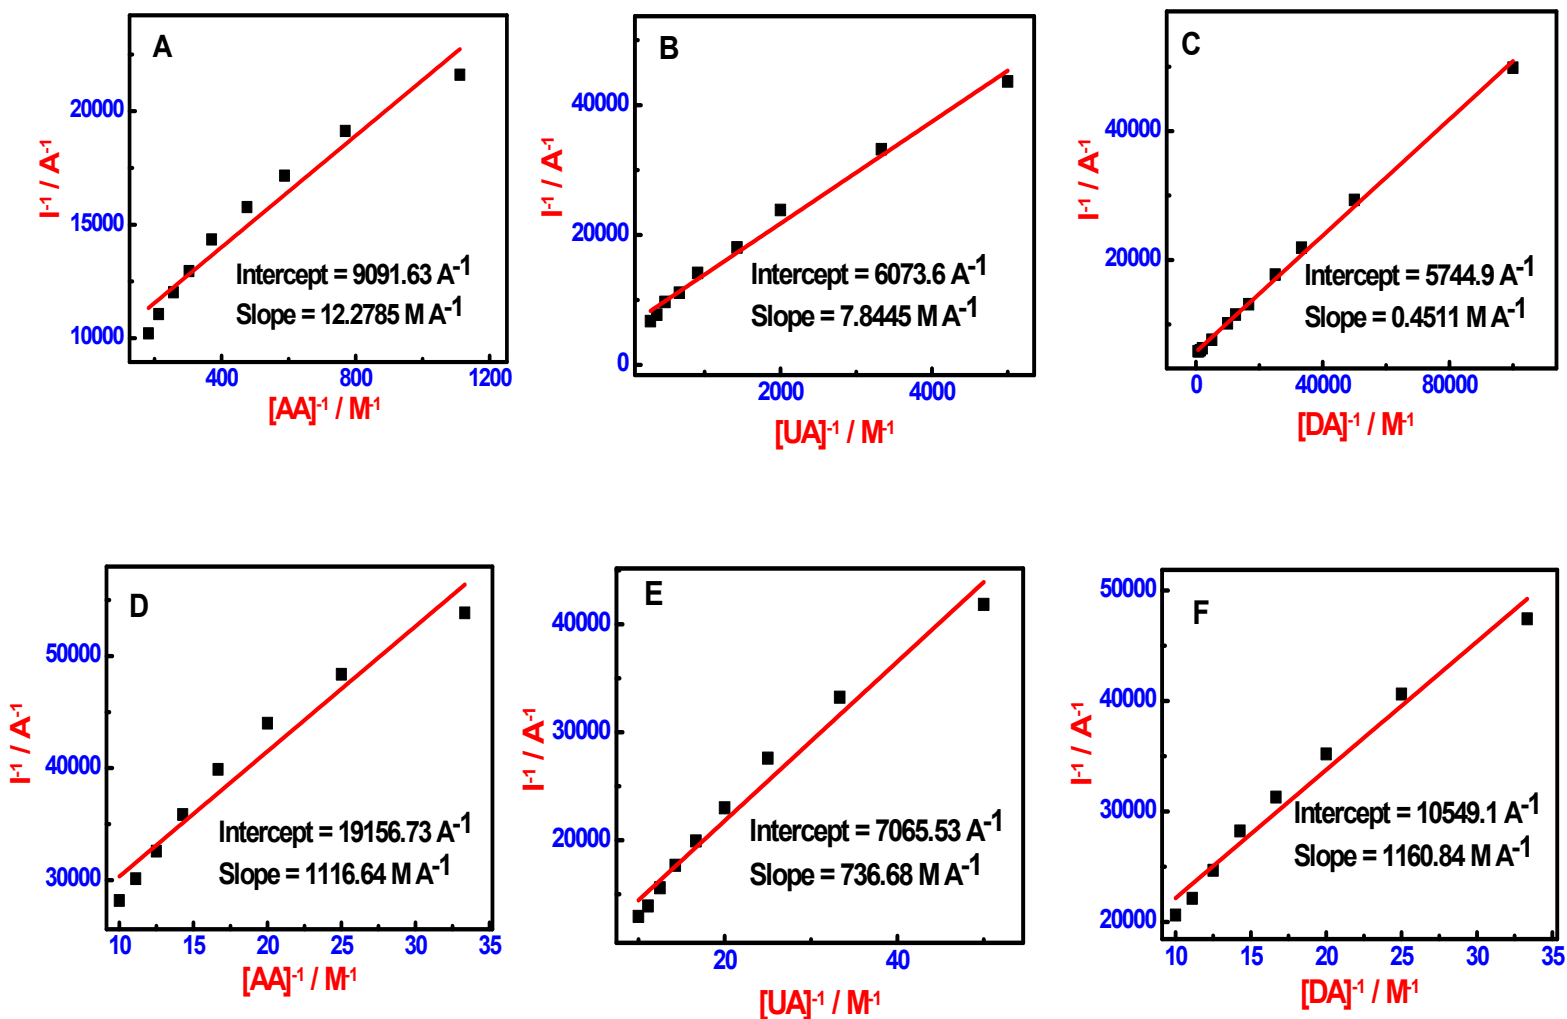

Fig. S6. Reproducibility detections of AA, UA and DA by differential pulse voltammetry

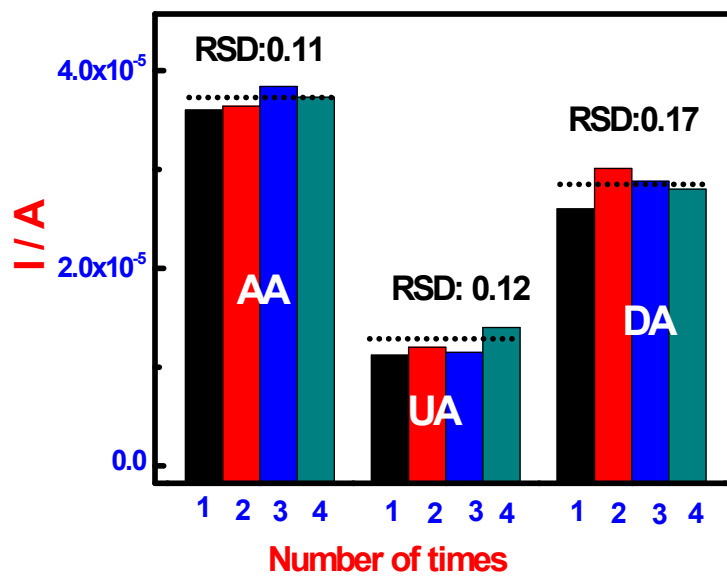

Table S1. Michaelis-Menten kinetic parameter  $k_M$ , linear ranges and lowest detection limits observed at the PGO-AuNP and PErGO-AuNP surfaces respectively for the AA, UA and DA in PBS buffer.

| <b>Parameter</b>                                  | <b>Analyte</b> | <b>PGO-AuNP</b> | <b>PErGO-AuNP</b> |
|---------------------------------------------------|----------------|-----------------|-------------------|
| <b><math>K_M</math> (mM)</b>                      | AA             | 1.35            | 58                |
|                                                   | UA             | 1.28            | 104               |
|                                                   | DA             | 0.07            | 110               |
| <b>Linear range (<math>\mu\text{M}</math>)</b>    | AA             | 200 - 800       | 1 - 6000          |
|                                                   | UA             | 20 - 260        | 2 - 7000          |
|                                                   | DA             | 5 - 100         | 0.01 - 3000       |
| <b>Detection limit (<math>\mu\text{M}</math>)</b> | AA             | 200             | 1                 |
|                                                   | UA             | 20              | 2                 |
|                                                   | DA             | 5               | 0.01              |



Table S2. Literature review of simultaneous determinations of AA, UA and DA at graphene oxide /metal or metal oxide modified electrodes.

| S.No | Surface                                                                                           | Analyte                                                  | Detection limits                                         | pH     | References Number |
|------|---------------------------------------------------------------------------------------------------|----------------------------------------------------------|----------------------------------------------------------|--------|-------------------|
| 1.   | Au nanoparticles (NPs) and graphene oxide sheets (Au NP/GO) composites                            | AA                                                       | 100 nM,                                                  | pH 7.4 | 1                 |
| 2.   | Iron oxide/graphene modified glassy carbon electrode (Fe <sub>3</sub> O <sub>4</sub> /rGO/GCE)    | AA, and DA                                               | 1 mM and 0.5 $\mu$ M                                     | pH 6.5 | 2                 |
| 3.   | Graphene sheets and gold nanoparticles modified carbon fiber electrode (GE/Au/GE/CFE)             | DA and UA                                                | 0.59 $\mu$ M and 12.6 $\mu$ M                            | pH 7.4 | 3                 |
| 4.   | Gold nanoparticles (AuNPs) and graphene nanosheets (GNS)                                          | AA, DA and UA                                            | 1mM , 0.2mM and 0.2mM .                                  | pH 7.0 | 4                 |
| 5.   | reduced graphene oxide-supported Au@Pd (Au@Pd-RGO) nanocomposites                                 | AA, DA, and UA                                           | 0.28, 0.024, and 0.02 $\mu$ M                            | pH 7.0 | 5                 |
| 6.   | AuNPs / MoS <sub>2</sub> nanocomposite                                                            | AA, DA and UA                                            | 50, 0.05 and 50 $\mu$ M                                  | pH 7.0 | 6                 |
| 7.   | Multi-walled carbon nanotube/Azure A/gold nanoparticle composites (Nafion/AuNPs/AzA/MWCNTs)       | AA, DA, UA and tryptophan                                | 300 $\mu$ M, 0.5 $\mu$ M, 0.5 $\mu$ M and 1.0 $\mu$ M,   | pH 7.0 | 7                 |
| 8.   | reduced graphene oxide modified glassy carbon electrode (RGO-GCE)                                 | AA, DA and UA,                                           | 4.2 $\mu$ M, 8 nM and 0.6 $\mu$ M,                       | pH 3.0 | 8                 |
| 9.   | screen-printed graphene electrode                                                                 | AA, DA, and UA                                           | 0.95 , 0.12 and 0.20 $\mu$ M                             | pH 7.0 | 9                 |
| 10.  | electrochemical reduction of graphene oxide (GO) attached through 1,6-hexadamine on GCE           | UA, xanthine (XN), hypoxanthine (HXN) and caffeine (CAF) | 0.08 $\mu$ M, 0.1 $\mu$ M, 0.32 $\mu$ M and 0.43 $\mu$ M | pH 7.2 | 10                |
| 11.  | Poly(methylene blue) / and electrochemically reduced graphene oxide composite film (PMB-ERGO/GCE) | UA and xanthine (Xa)                                     | 0.03 $\mu$ M and 0.05 $\mu$ M                            | pH 3.0 | 11                |
| 12.  | Nitrogen doped graphene                                                                           | AA, DA and UA                                            | 2.2 $\mu$ M, 0.25 $\mu$ M and 0.045 $\mu$ M              | pH 6.0 | 12                |
| 13.  | Chitosan functionalized graphene                                                                  | AA, DA and UA                                            | 50, 1.0 and 2.0 $\mu$ M                                  | pH 7.0 | 13                |
| 14.  | Graphene oxide-templated polyaniline (GO-PAN) microsheets                                         | AA, DA and UA                                            | 5, 5 and 10 $\mu$ M                                      | pH 7.4 | 15                |
| 15.  | PErGO-AuNP                                                                                        | AA, DA and UA                                            | 1 $\mu$ M, 10 nM, and 2 $\mu$ M                          | pH 7.4 | This Work         |

## References

- [1]. J. Song, L. Xu, R. Xing, Q. Li, C. Zhou, D. Liu, H. Song, *Sci. Rep.*, 2014, **4**, 7515
- [2]. T. Peik-See, A. Pandikumar, H. N.Ming, L. H. Ngee, Y. Sulaiman, *Sensors*, 2014, **14**, 15227
- [3]. J. Du, R. Yue, F. Ren, Z. Yao, F. Jiang, P. Yang, Y. Du, *Gold Bull*, 2013, **46**, 137
- [4]. C. Wang, F. Ye, H. Wu, Y. Qian, *Int. J. Electrochem. Sci.*, 2013, **8**, 2440
- [5]. J. Jiang, X. Du, *Nanoscale*, 2014, **6**, 11303
- [6]. H. Sun, J. Chao, X. Zuo, S. Su, X. Liu, L. Yuwen, C. Fan L. Wang, *RSC Adv.*, 2014, **4**, 27625
- [7]. H. Filik, A. A. Avan, S. Aydar *Arabian Journal of Chemistry* 2015
- [8]. P. K. Aneesh, S. R. Nambiar, T. P. Rao, A. Ajayaghosh, *Anal. Methods*, 2014, **6**, 5322
- [9]. J. Ping, J. Wu, Y. Wang, Y. Ying, *Biosensors and Bioelectronics*, 2012, **34**, 70
- [10]. M. Amal Raj, S. Abraham John, *Anal. Chim. Acta*, 2013, **771**, 14
- [11]. G. Liu, W. Ma, Y. Luo, D. Sun, S. Shao, *Journal of Analytical Methods in Chemistry*, 2014, **10**, 2014
- [12]. Z. H. Shenga, X.Q. Zhenga, J. Y. Xua, W.J. Baoa, F.B. Wang, X.H. Xiaa, *Biosensors and Bioelectronics*, 2012, **34**, 125
- [13]. D. Han, T. Han, C. Shan, A. Ivaska, L. Niua, *Electroanalysis* 2010, **22**, 2001
- [14]. Y. Bao, J. Song, Y. Mao, D. Han, F. Yang, L. Niu, A. Ivaska, *Electroanalysis* 2011, **23**, 878
